# Supplementary material for: Septin 7 interacts with Numb to preserve sarcomere structural organization and muscle contractile function
Source: PubMed Central journal article supplement (PMC11065422; doi:10.7554/elife.89424), 2024-05-02

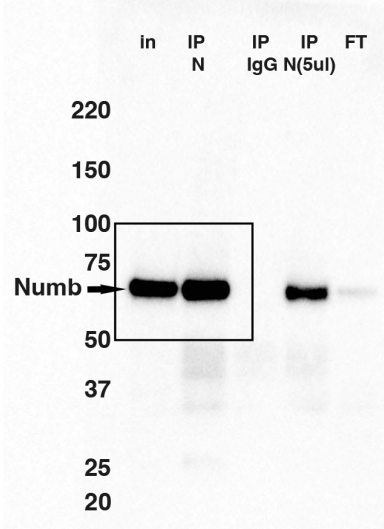

Supplement: elife-89424-fig5-data2.pdf [file elife-89424-fig5-data2.pdf]
