# Supplementary material for: Septin 7 interacts with Numb to preserve sarcomere structural organization and muscle contractile function
Source: PubMed Central journal article supplement (PMC11065422; doi:10.7554/elife.89424), 2024-05-02

IP Silver stain

a b c d e f g

250  
150  
100  
75  
50  
37  
25  
20  
15  
10

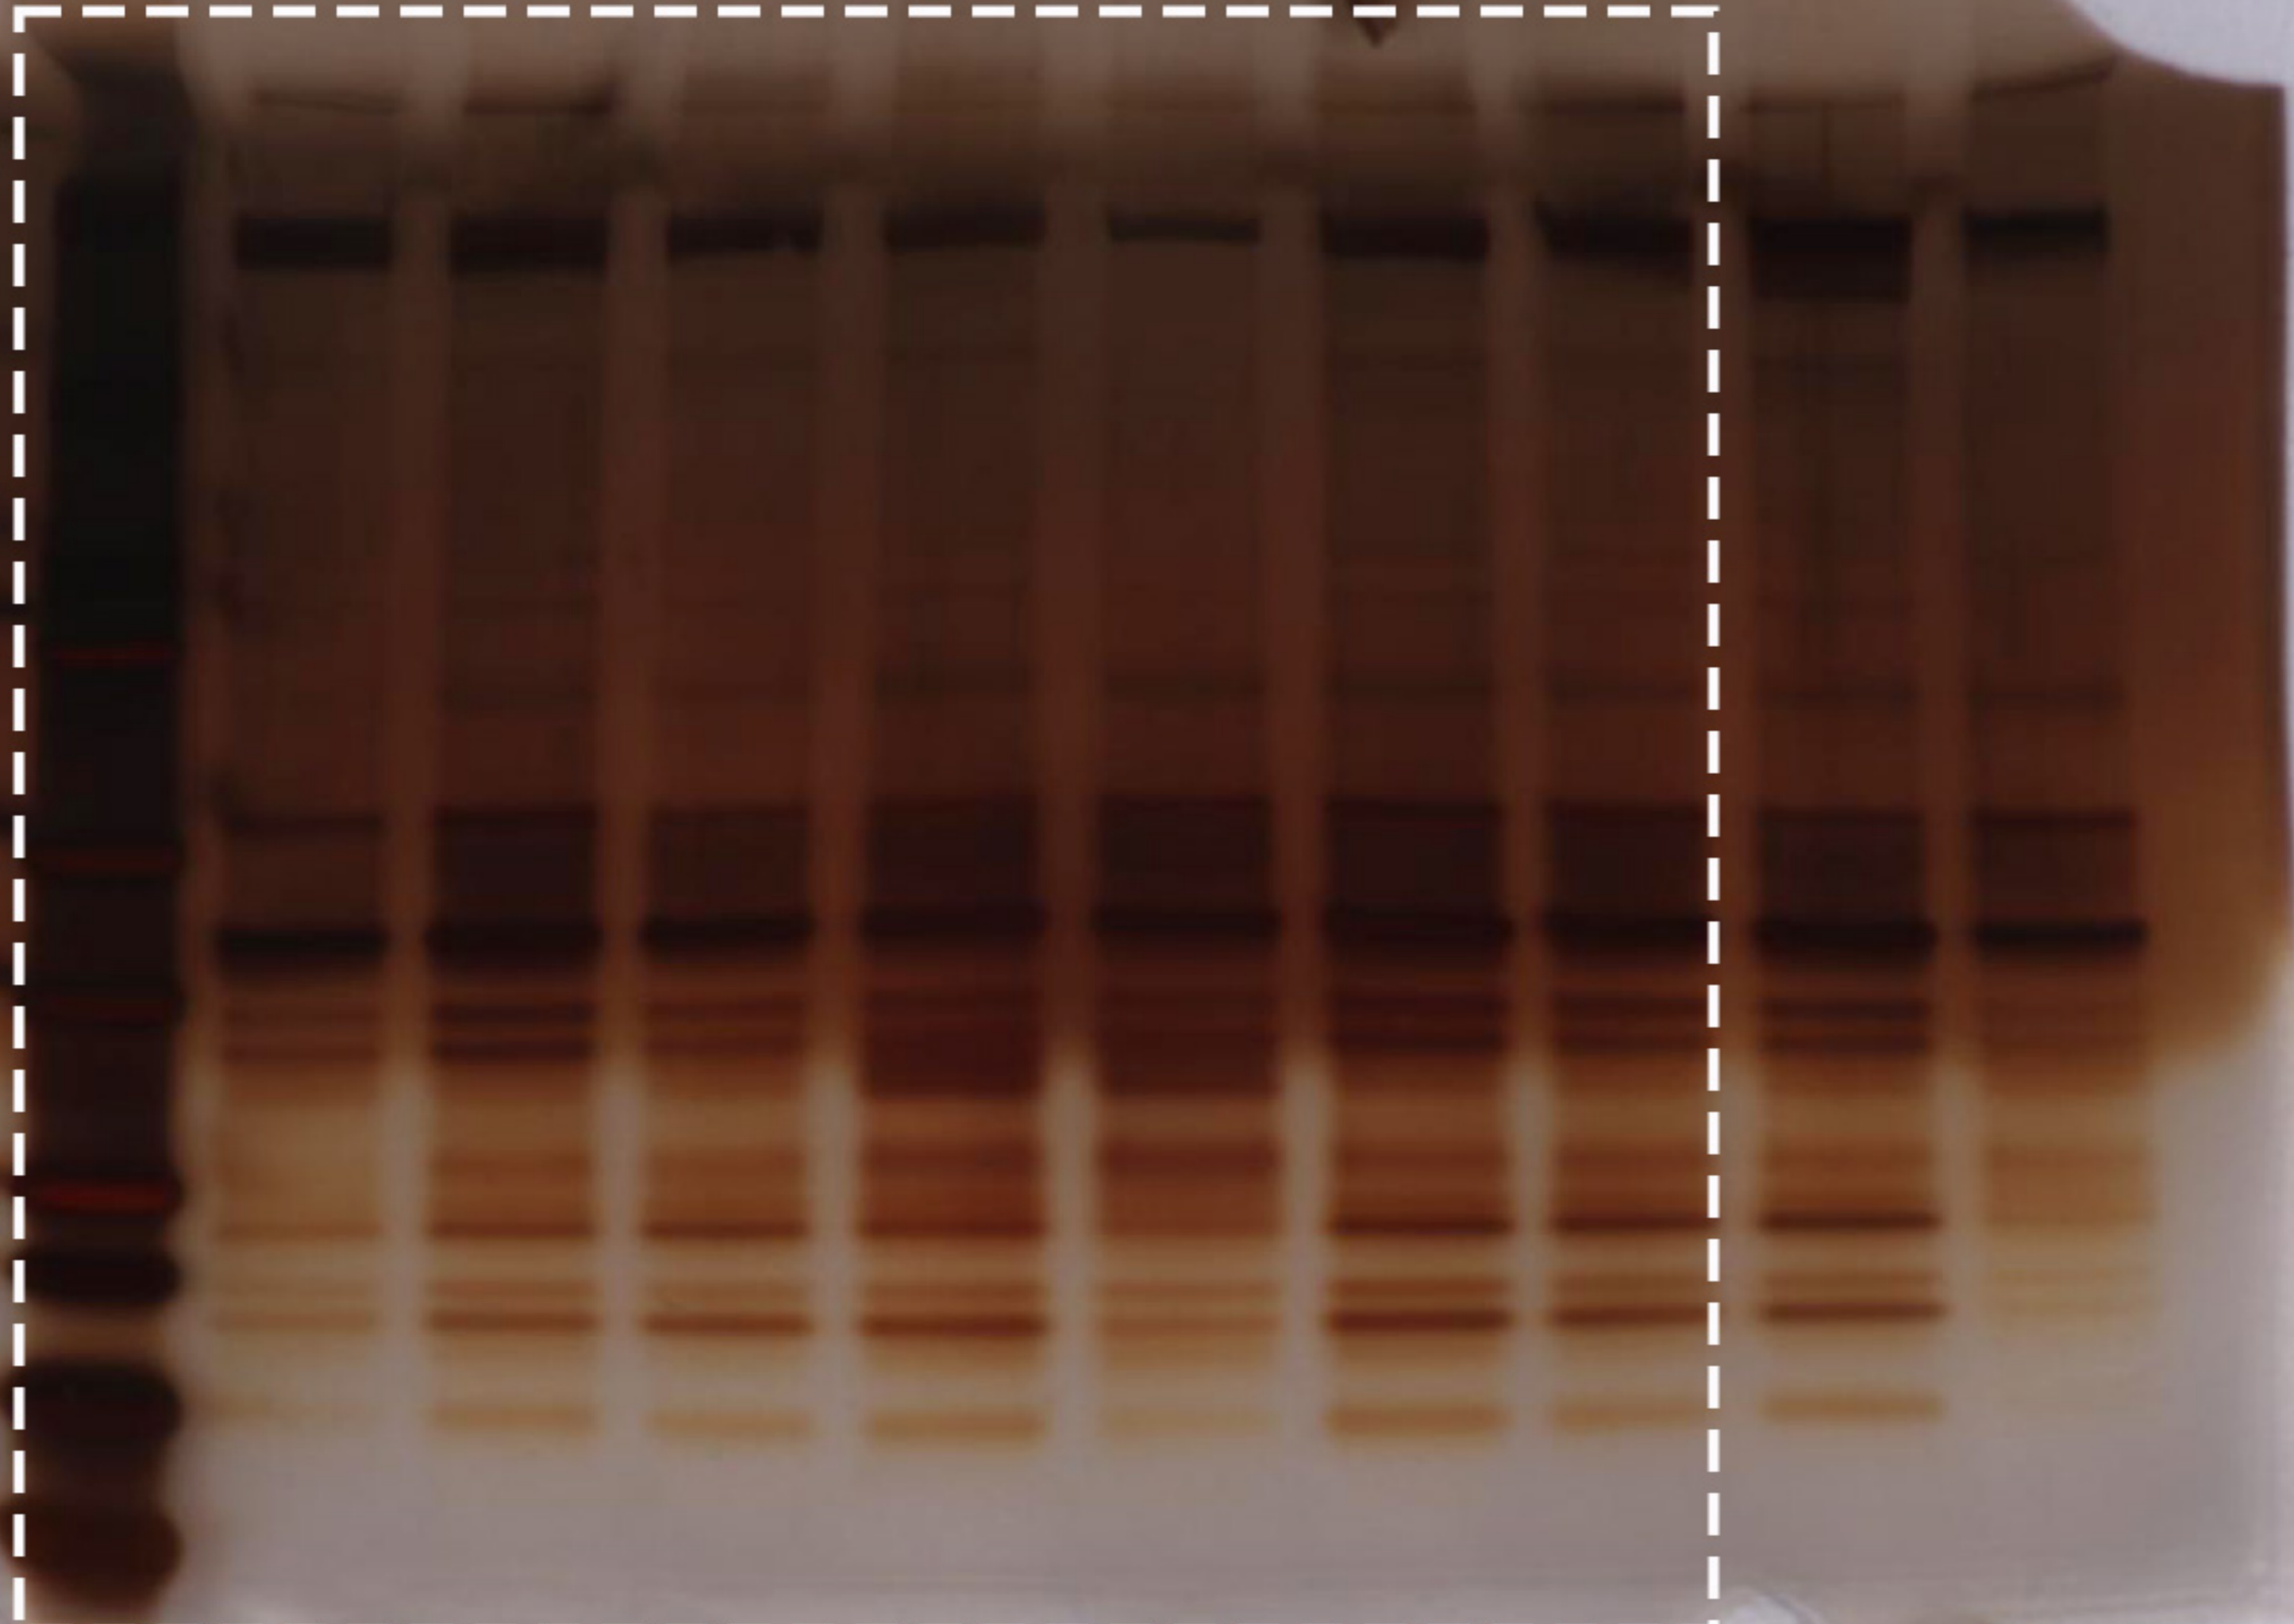

Supplement: elife-89424-fig5-data4.pdf [file elife-89424-fig5-data4.pdf]
