# Supplementary material for: Septin 7 interacts with Numb to preserve sarcomere structural organization and muscle contractile function
Source: PubMed Central journal article supplement (PMC11065422; doi:10.7554/elife.89424), 2024-05-02
Supplement: elife-89424-table1-data3.pdf [file elife-89424-table1-data3.pdf]

## Q80YV2|NIPA\_MOUSE Nuclear-interacting partner of ALK

### Example Peptide Abundances for AVLTILLAHKR (3+)

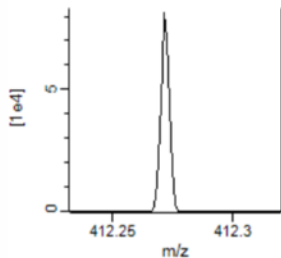

No Signal

1617 - Numb

Control

| Peptides | Sequence coverage [%] | Protein Score | Abundance Ratio (Numb/ Control) | P-value (Control vs. Numb) |
|----------|-----------------------|---------------|---------------------------------|----------------------------|
| 17       | 47.1                  | 85            | 1.0E+06                         | 0                          |

### Example MS/MS Spectra

Raw File 1617\_Numb\_JC\_081820\_100620\_5uL2 Scan 31266 Method FTMS; HCD Score 38.8 m/z 412.27

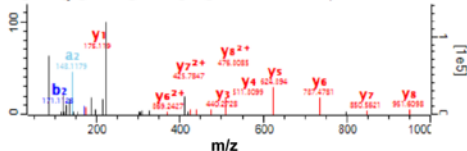

AVLTILLAHKR (3+)

Raw File 520\_Numb\_JC\_081820\_100720\_4uL2 Scan 52663 Method FTMS; HCD Score 162.93 m/z 767.39

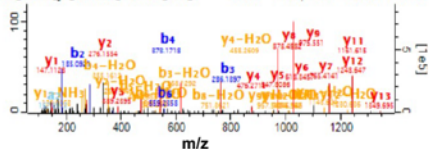

AATSEGPLFAASIEK (2+)
