# Supplementary material for: Septin 7 interacts with Numb to preserve sarcomere structural organization and muscle contractile function
Source: PubMed Central journal article supplement (PMC11065422; doi:10.7554/elife.89424), 2024-05-02

## Q8K2H6|APC10\_MOUSE Anaphase-promoting complex subunit 10

### Example Peptide Abundances for VGNNFHNLQEIR (3+)

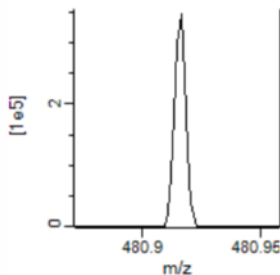

No Signal

| Peptides | Sequence coverage [%] | Protein Score | Abundance Ratio (Numb/ Control) | P-value (Control vs. Numb) |
|----------|-----------------------|---------------|---------------------------------|----------------------------|
| 4        | 31.4                  | 11            | 1.0E+06                         | 0                          |

520 - Numb

Control

### Example MS/MS Spectra

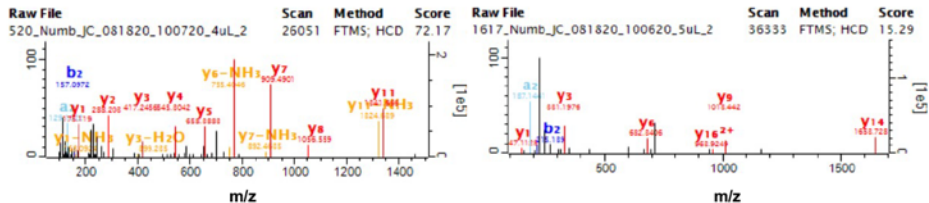

Supplement: elife-89424-table1-data6.pdf [file elife-89424-table1-data6.pdf]
