# Supplementary material for: Septin 7 interacts with Numb to preserve sarcomere structural organization and muscle contractile function
Source: eLife journal article supplement (doi:10.7554/elife.89424), 2023-09-12

# Numb

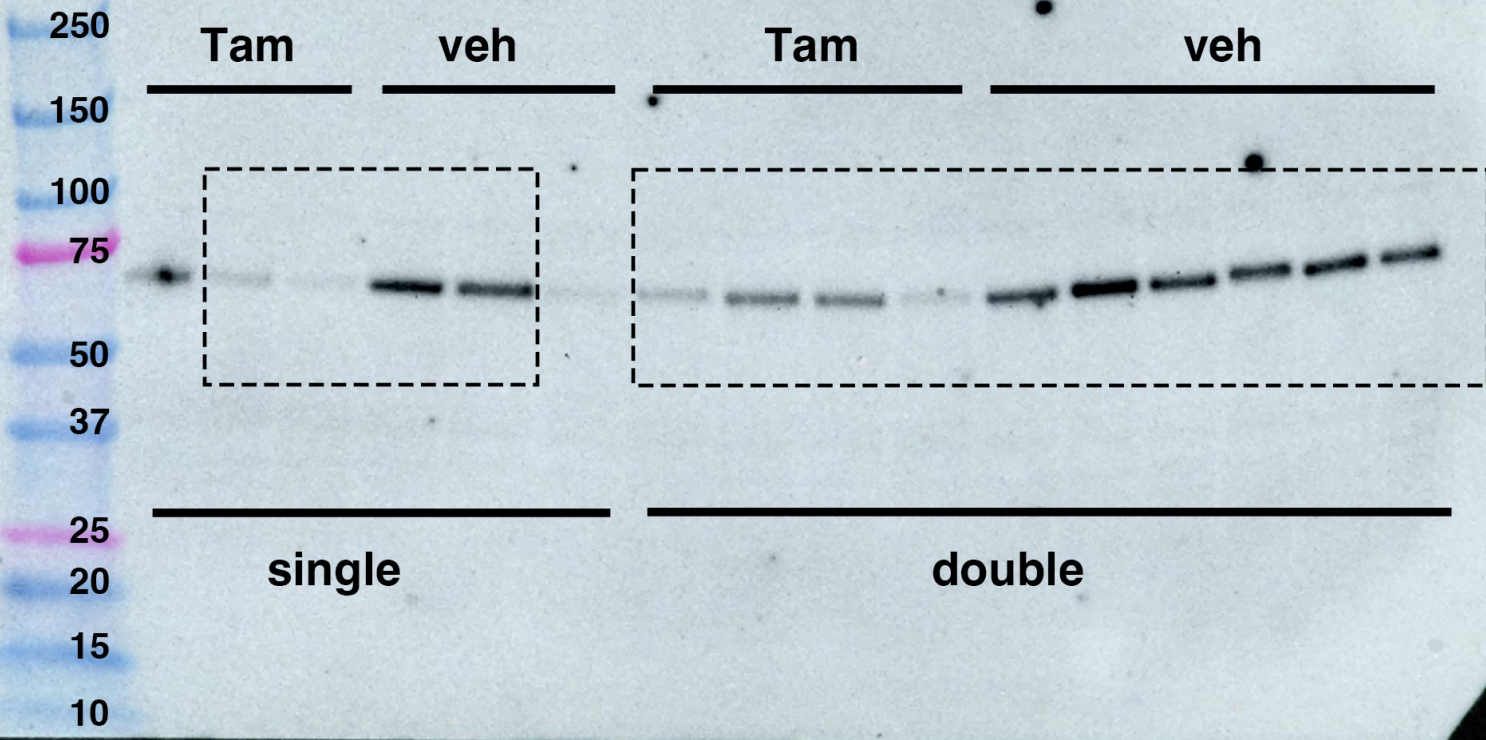

# GAPDH

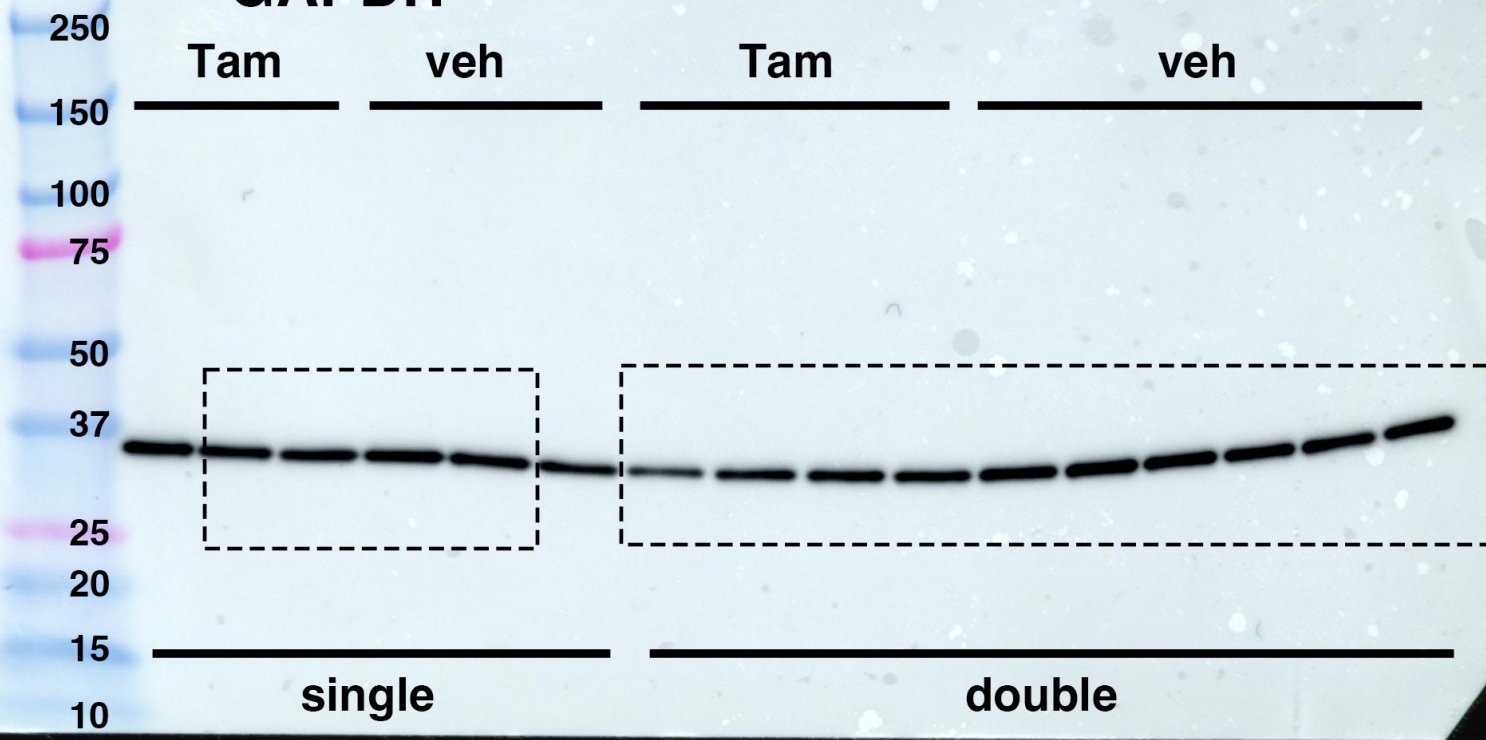

Supplement: fig2-data2 [file elife-89424-fig2-data2-v1.pdf]
