# Supplementary material for: Septin 7 interacts with Numb to preserve sarcomere structural organization and muscle contractile function
Source: eLife journal article supplement (doi:10.7554/elife.89424), 2023-09-12
Supplement: table1-data1 [file elife-89424-table1-data1-v1.pdf]

# O55131|SEPT7\_MOUSE Septin-7

## Example Peptide Abundances for VNIPLIAK (2+)

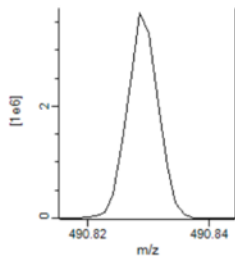

67 - Numb

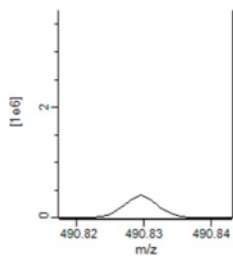

67 - Control

| Peptides | Sequence coverage [%] | Protein Score | Abundance Ratio (Numb/ Control) | P-value (Control vs. Numb) |
|----------|-----------------------|---------------|---------------------------------|----------------------------|
| 32       | 67.7                  | 210           | 82.9                            | 3.6E-03                    |

## Example MS/MS Spectra

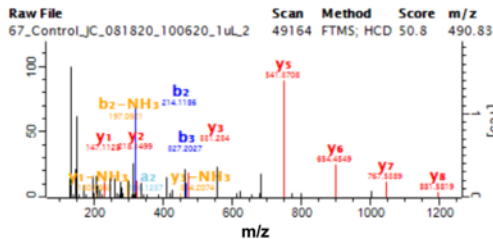

VNIPLIAK (2+)

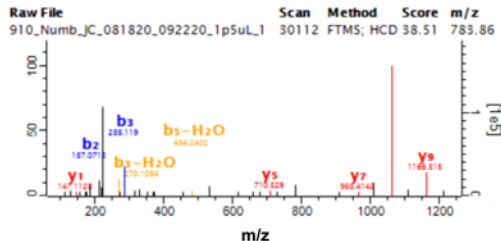

ADLTPEECQQFK (2+)
