# Supplementary material for: Septin 7 interacts with Numb to preserve sarcomere structural organization and muscle contractile function
Source: eLife journal article supplement (doi:10.7554/elife.89424), 2023-09-12
Supplement: table1-data2 [file elife-89424-table1-data2-v1.pdf]

# Q01063|PDE4D\_MOUSE cAMP-specific 3,5-cyclic phosphodiesterase 4D

## Example Peptide Abundances for ELTHLSEMSR (3+)

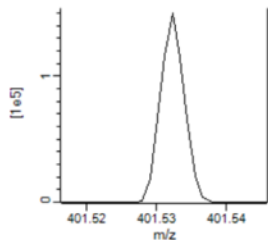

No Signal

520 - Numb

Control

| Peptides | Sequence coverage [%] | Protein Score | Abundance Ratio (Numb/ Control) | P-value (Control vs. Numb) |
|----------|-----------------------|---------------|---------------------------------|----------------------------|
| 5        | 9.6                   | 14            | 1.0E+06                         | 0                          |

## Example MS/MS Spectra

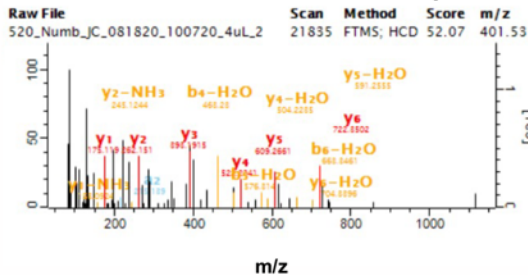

ELTHLSEMSR (3+)

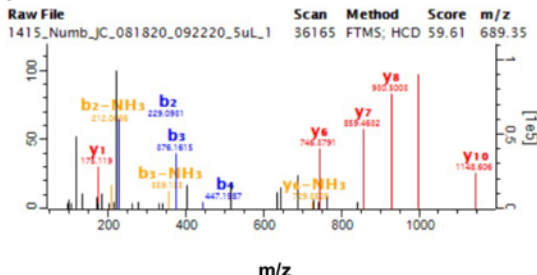

NNFAALTNLQDR (2+)
