# Supplementary material for: Septin 7 interacts with Numb to preserve sarcomere structural organization and muscle contractile function
Source: eLife journal article supplement (doi:10.7554/elife.89424), 2023-09-12
Supplement: table1-data4 [file elife-89424-table1-data4-v1.pdf]

## Q8BZQ7|ANC2\_MOUSE Anaphase-promoting complex subunit 2

### Example Peptide Abundances for IEELFSIIR (2+)

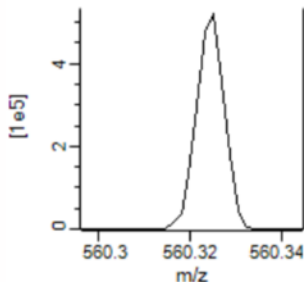

67 - Numb

No Signal

Control

| Peptides | Sequence coverage [%] | Protein Score | Abundance Ratio (Numb/ Control) | P-value (Control vs. Numb) |
|----------|-----------------------|---------------|---------------------------------|----------------------------|
| 27       | 36.2                  | 142           | 1.0E+06                         | 0                          |

### Example MS/MS Spectra

Raw File: 67\_Numb\_JC\_081820\_100720\_1uL\_3  
Scan: 51702  
Method: FTMS; HCD  
Score: 137.14

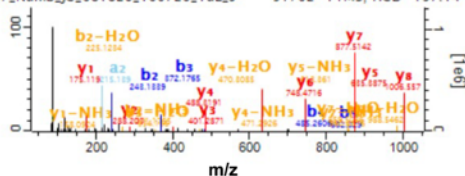

IEELFSIIR (2+)

Raw File: 910\_Numb\_JC\_081820\_092220\_1p5uL\_1  
Scan: 42757  
Method: FTMS; HCD  
Score: 160.2

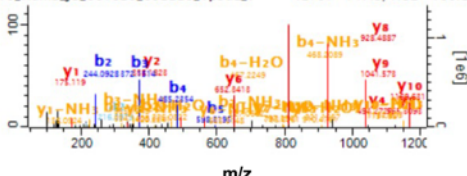

DQQLIYSAGVYR (2+)
