# Supplementary material for: Septin 7 interacts with Numb to preserve sarcomere structural organization and muscle contractile function
Source: eLife journal article supplement (doi:10.7554/elife.89424), 2023-09-12
Supplement: table1-data5 [file elife-89424-table1-data5-v1.pdf]

## Q91W96|APC4\_MOUSE Anaphase-promoting complex subunit 4

### Example Peptide Abundances DLIALANTTGEVLLHR (3+)

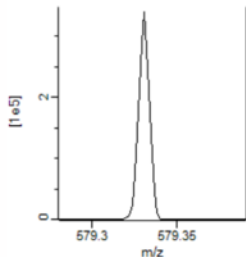

1617 - Numb

No Signal

Control

| Peptides | Sequence coverage [%] | Protein Score | Abundance Ratio (Numb/ Control) | P-value (Control vs. Numb) |
|----------|-----------------------|---------------|---------------------------------|----------------------------|
| 26       | 38.5                  | 97            | 1.0E+06                         | 0                          |

### Example MS/MS Spectra

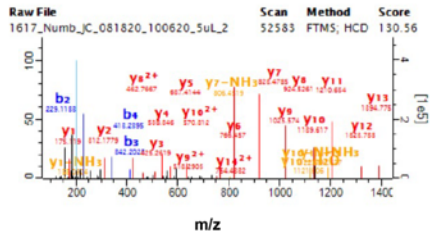

DLIALANTTGEVLLHR (3+)

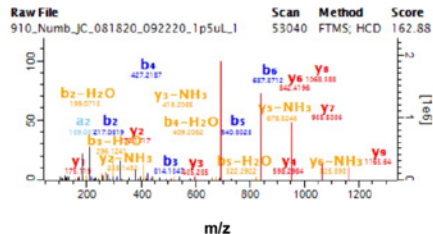

ESPLLFYYPR (2+)
